# Supplementary material for: Variation of the Performance of Machine-Learning Based Image Classifier in Automated Detection of Itch-Induced Scratch
Source: Preprints.org preprint supplement (doi:10.20944/preprints202001.0205.v1), 2020-01-19
Supplement: Supplementary file 1 [file supplementary]

## Supplementary materials

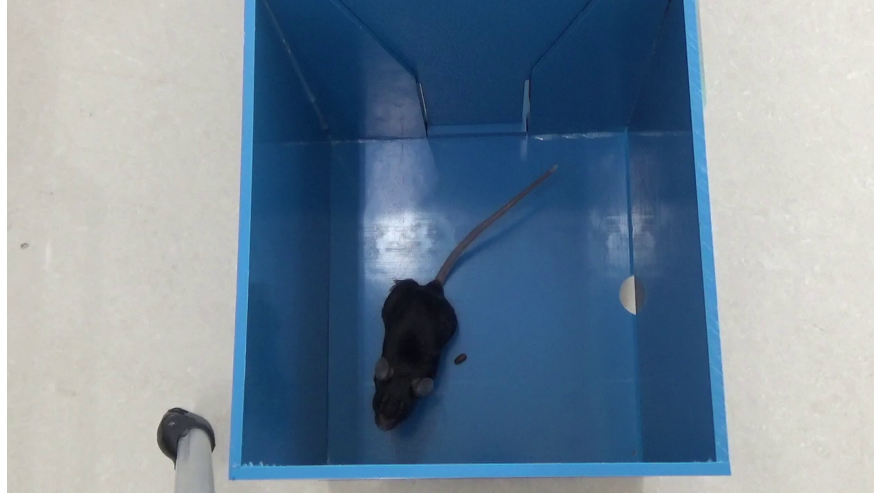

Figure 1: Original LASV image (311out4381.png) with high degree (51.22) of sharpness.

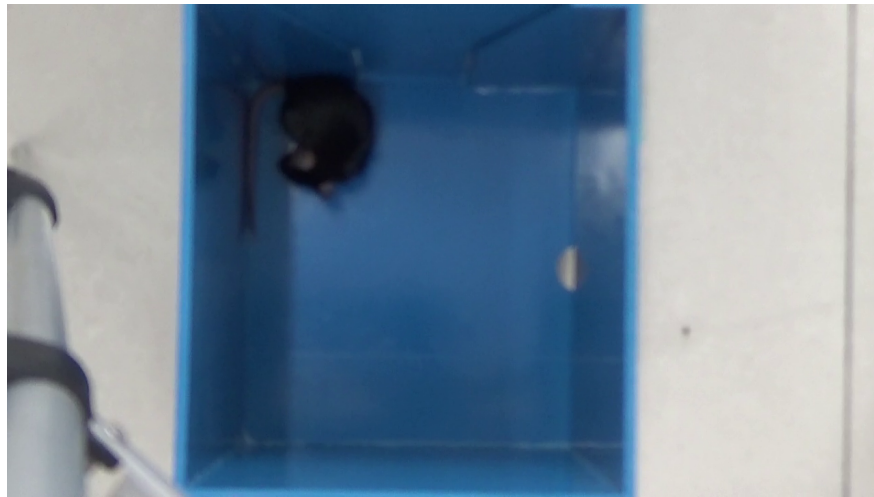

Figure 2: Original LASV image (306out11856.png) with low degree (6.23) of sharpness.

| Video number                              | 305    | 306    | 309    | 310    | 311    | Total/Average |
|-------------------------------------------|--------|--------|--------|--------|--------|---------------|
| <b>Total number of images (X1)</b>        | 25542  | 27659  | 27020  | 28268  | 27280  | 135769        |
| <b>Trained Scratch (X2)</b>               | 330    | 2350   | 3860   | 5820   | 1290   | 13650         |
| <b>Trained Non Scratch (X3)</b>           | 2786   | 2834   | 2644   | 2526   | 2860   | 13650         |
| <b>Trained Total (X4=X2+X3)</b>           | 3116   | 5184   | 6504   | 8346   | 4150   | 27300         |
| <b>Trained Scratch Ratio (X2/X1)</b>      | 0.0129 | 0.0849 | 0.1428 | 0.2058 | 0.0472 | 0.1005        |
| <b>Trained Non-Scratch Ratio (X3/X1)</b>  | 0.1091 | 0.1027 | 0.0978 | 0.0893 | 0.1048 | 0.1005        |
| <b>Trained Total Ratio (X4/X1)</b>        | 0.1220 | 0.1876 | 0.2406 | 0.2951 | 0.1520 | 0.2010        |
| <b>Scratch Test True (X5)</b>             | 203    | 2100   | 3587   | 5394   | 762    | 12046         |
| <b>Scratch Test False (X6)</b>            | 127    | 250    | 273    | 426    | 528    | 1604          |
| <b>Scratch Test Total (X7=X5+X6)</b>      | 330    | 2350   | 3860   | 5820   | 1290   | 13650         |
| <b>Non-Scratch Test True (X8)</b>         | 24796  | 21465  | 13653  | 10874  | 25312  | 96100         |
| <b>Non-Scratch Test False (X9)</b>        | 416    | 3844   | 9507   | 11574  | 678    | 26019         |
| <b>Non-Scratch Test Total (X10=X8+X9)</b> | 25212  | 25309  | 23160  | 22448  | 25990  | 122119        |
| <b>Overall Sensitivity (X5/X7)</b>        | 0.6152 | 0.8936 | 0.9293 | 0.9268 | 0.9558 | 0.8824        |
| <b>Overall Specificity (X8/X10)</b>       | 0.9835 | 0.8481 | 0.5895 | 0.4844 | 0.9739 | 0.7869        |
| <b>Overall Accuracy ((X5+X8)/X1)</b>      | 0.9787 | 0.8520 | 0.638  | 0.5755 | 0.9558 | 0.7965        |
| <b>C48/80 injection</b>                   | No     | Yes    | Yes    | Yes    | Yes    | Yes           |

Table 1: Overall statistics of the LASV images used for the training and the testing steps of machine-learning based image classification of the five LASVs and its overall performances, including accuracy, sensitivity and specificity. For video 305, 150 mM saline was injected subcutaneously to the neck of C57BL/6.
